# Supplementary material for: Evidence for an association between genetic and acoustic variation in the mimic poison frog Ranitomeya imitator
Source: Research Square preprint supplement (doi:10.21203/rs.3.rs-6607206/v1), 2025-05-20
Supplement: Supplementary file 1 [file 1ae40c91be85de0c7f1694d9.docx]

**Supplementary table 1:** Results of Shapiro-Wilks test for normality in the acoustic signals of each *R. imitator* color morph. W is the Shapiro-Wilks test statistic and P is the p-value for each color morph.


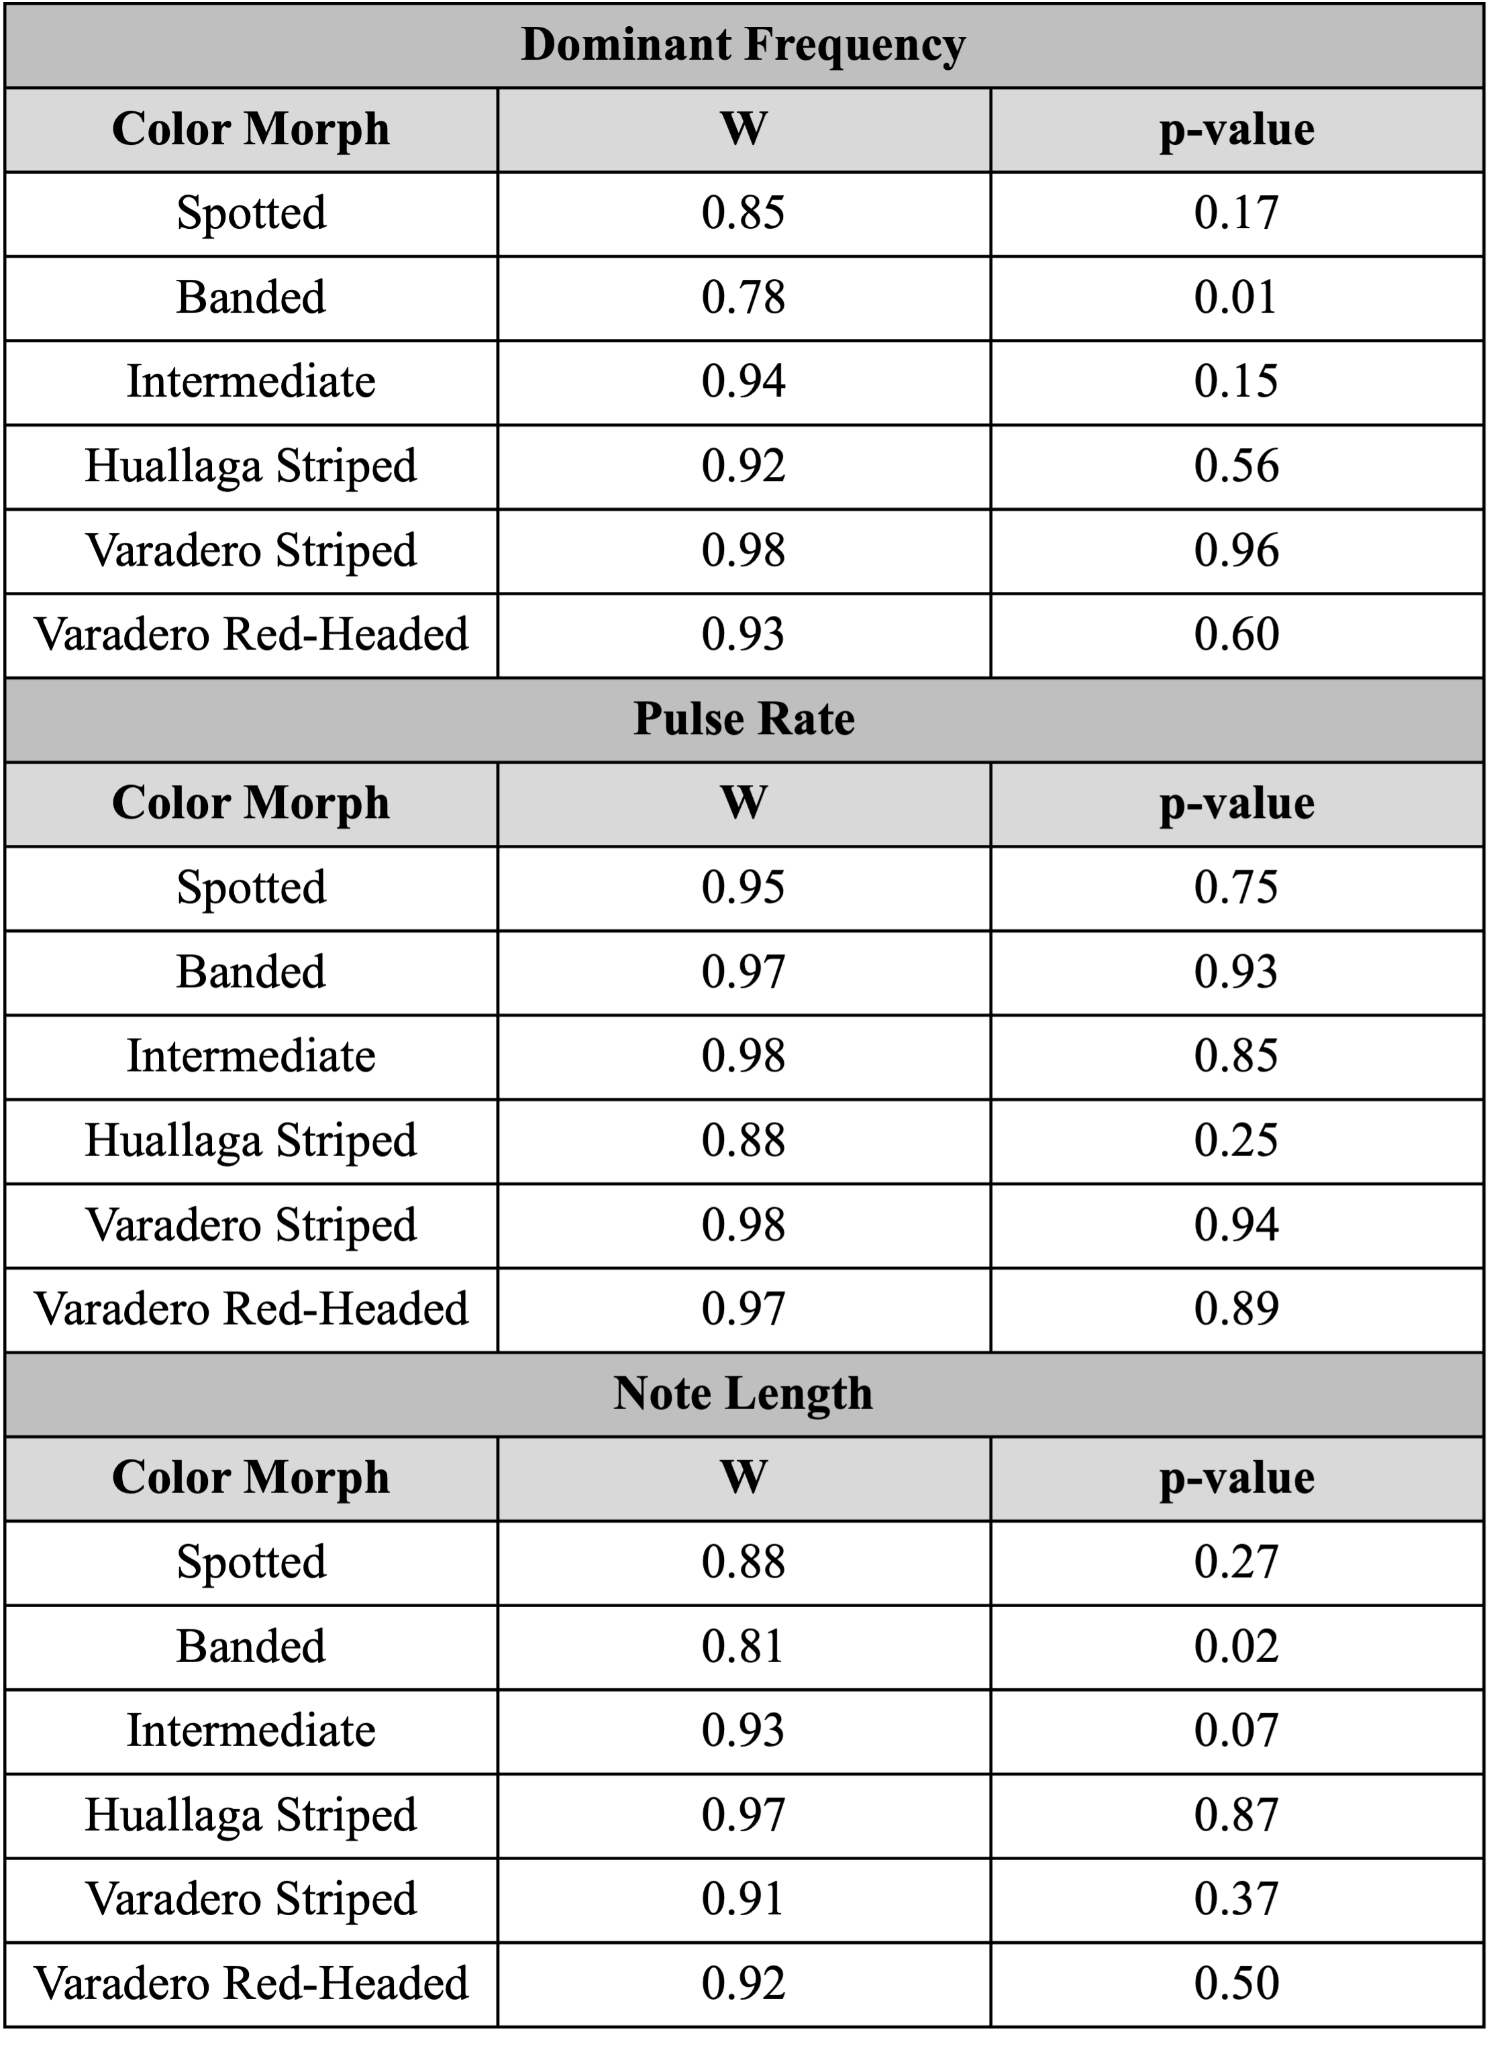


**Supplementary table 2:** Primers and motif regions used for each candidate gene.


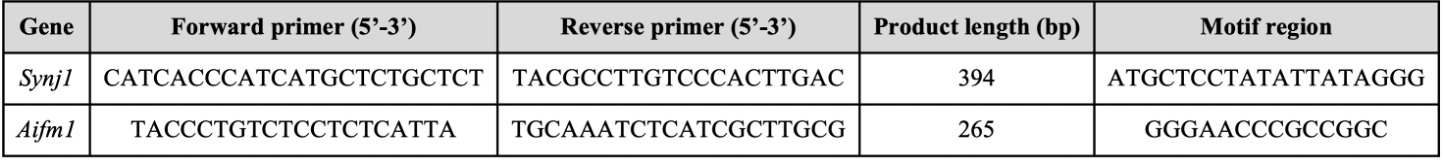


**Supplementary table 3:** PCR protocol used for amplifying the genes Synaptojanin 1 (*synj1*) and Apoptosis Inducing Factor Mitochondria Associated 1 (*aifm1*). Annealing temperature and number of cycles were adjusted if amplification failed using the original protocol.


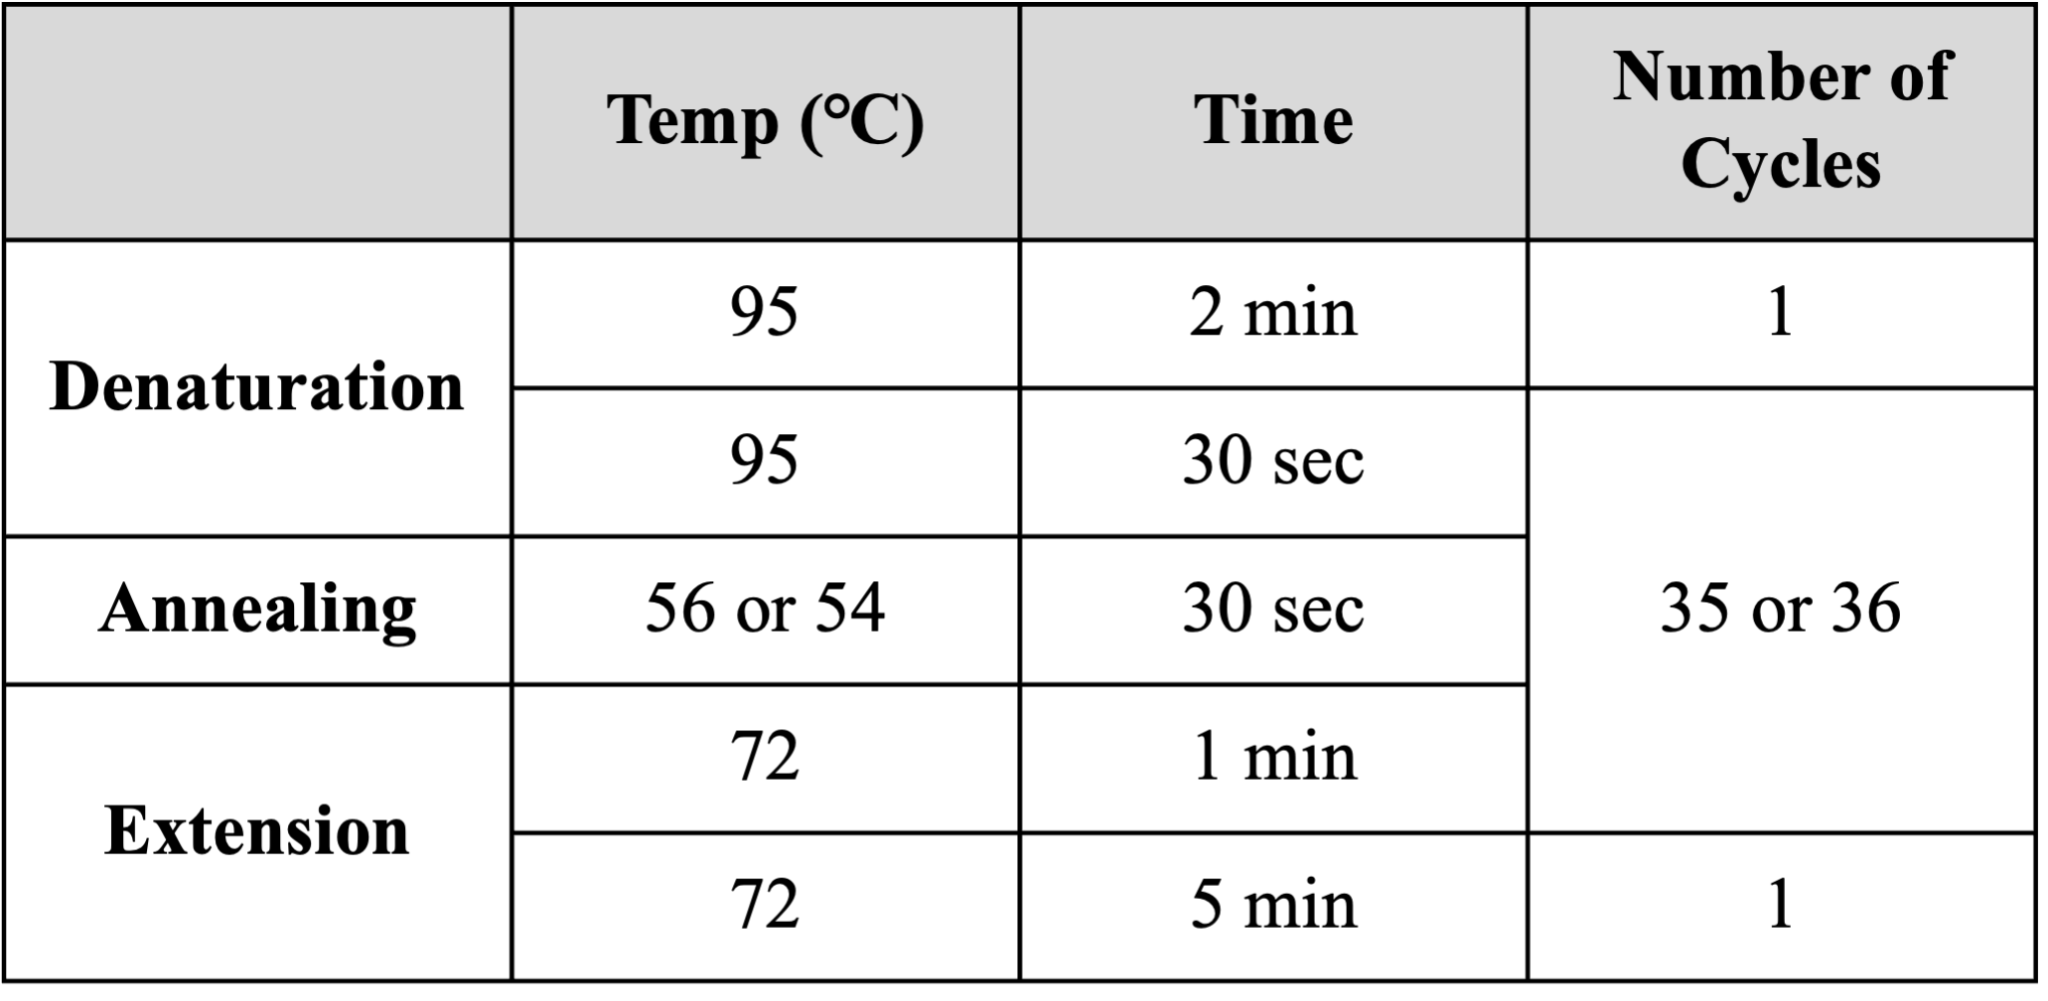


**
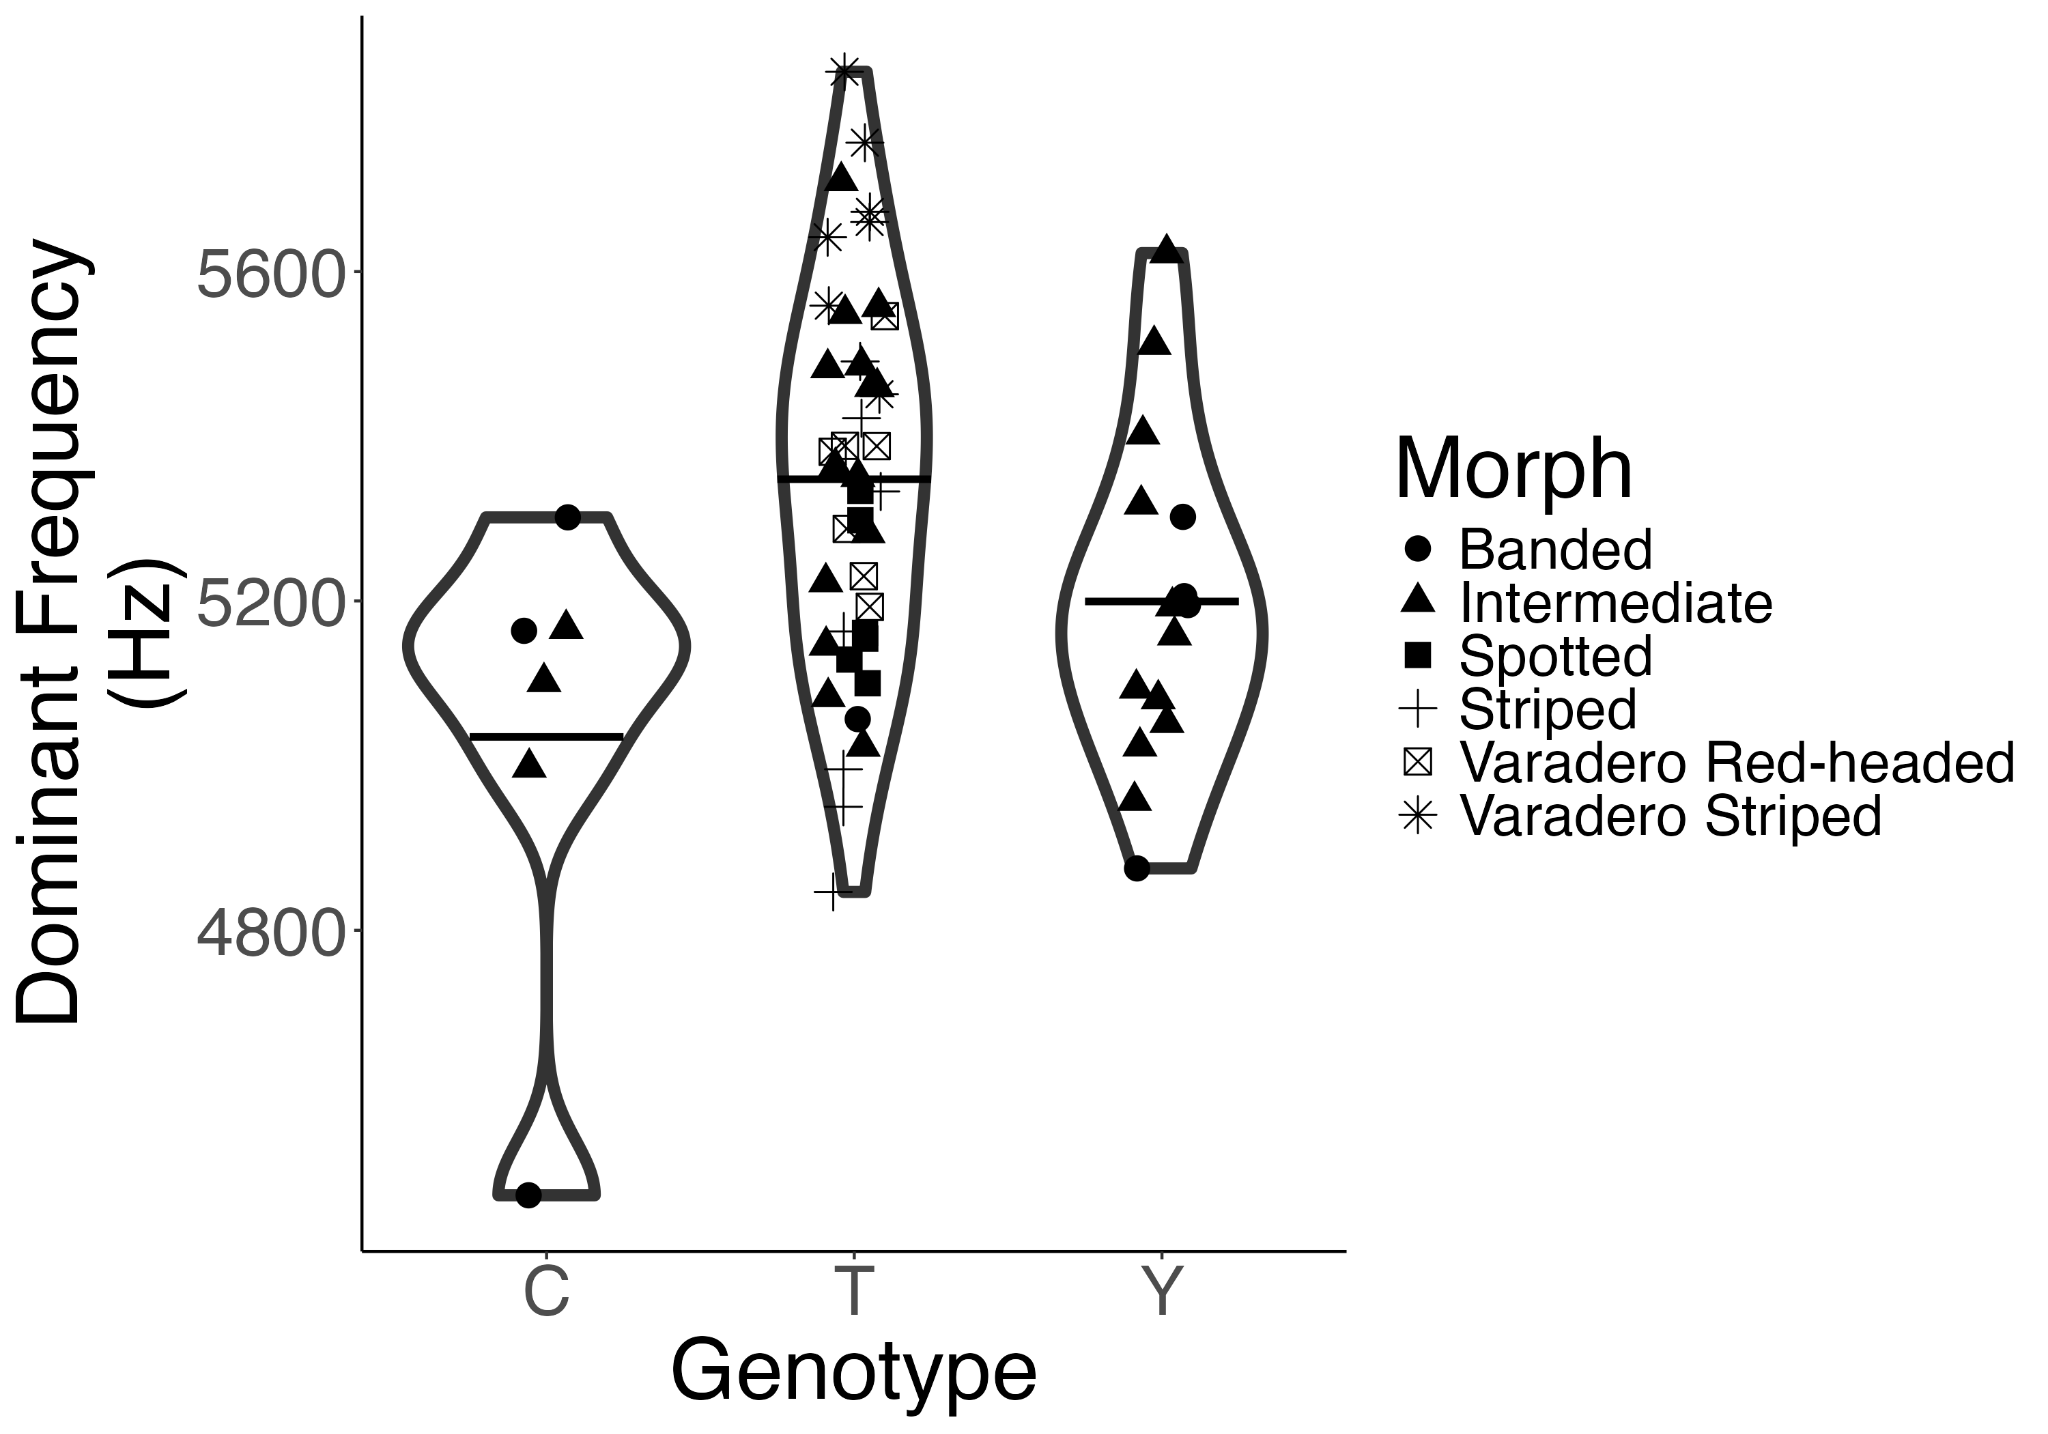
**

**Supplementary figure 1:** Relationship between dominant frequency and *aifm1* genotype plotted by color morph. Variation in *aifm1* is seen in the banded and intermediate color morphs.
